# Supplementary material
Source: MDPI journal article supplement (https://www.mdpi.com/2304-6740/6/3/82)
Supplement: s1 [file s1]

## Supplementary Materials:

## Phenylacetylene and Carbon Dioxide Activation by an Organometallic Samarium Complex

Violaine Goudy <sup>1</sup>, Mathieu Xémard <sup>1</sup>, Simon Karleskind <sup>1</sup>, Marie Cordier <sup>1</sup>, Carlos Alvarez Lamsfus<sup>2</sup>, Laurent Maron<sup>2</sup> and Grégory Nocton <sup>1,\*</sup>

I. <sup>1</sup>H NMR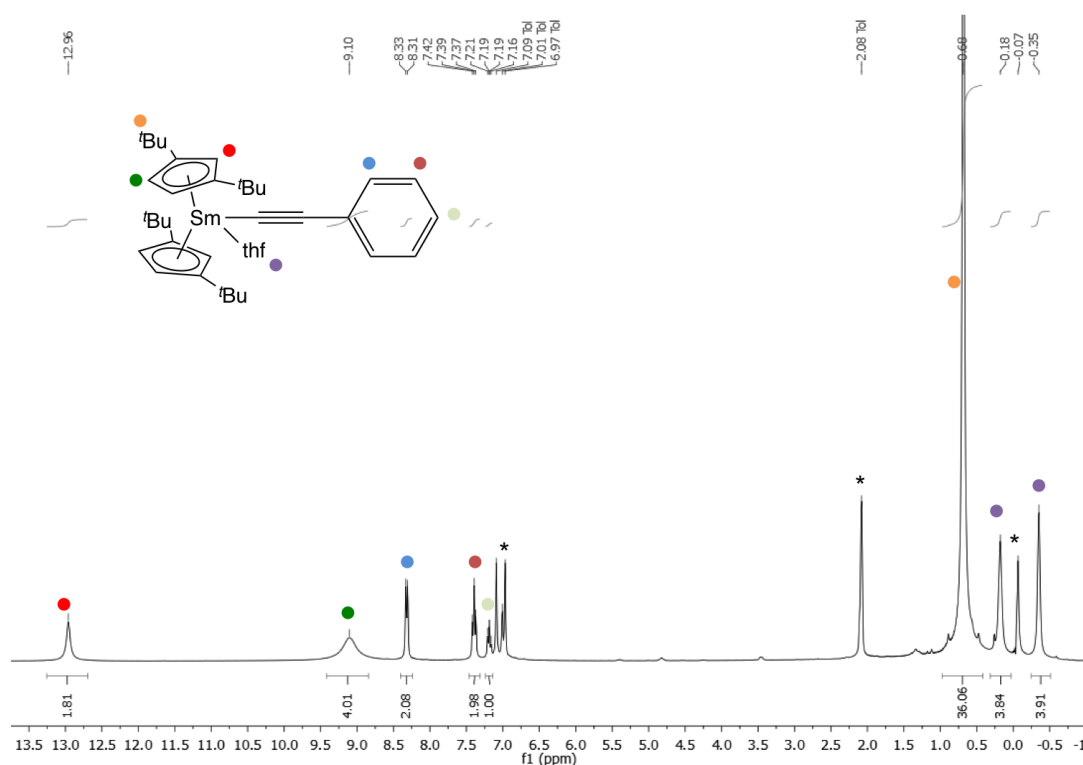

Figure S1. <sup>1</sup>H NMR of **1** in toluene-*d*<sub>8</sub>. \* for solvents and impurities.

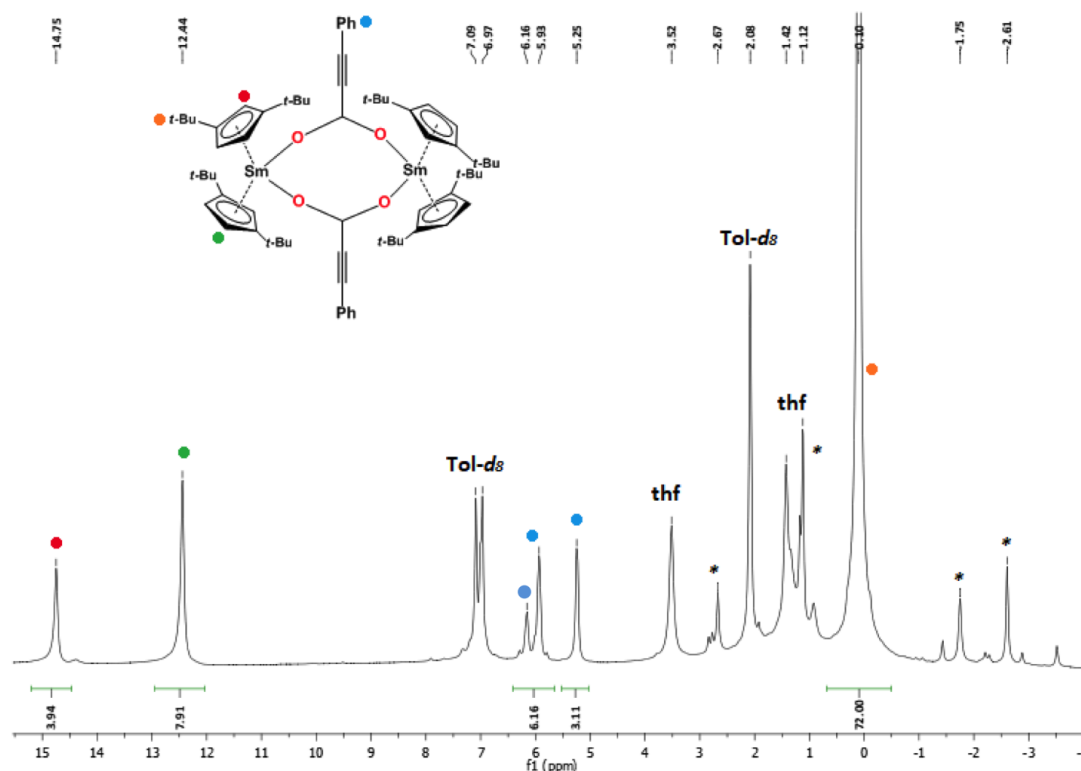

**Figure S2.**  $^1\text{H}$  NMR of **2** in toluene- $d_8$ . \* for solvents and impurities.

## II. X-ray Crystal Structure

Single crystals of the compounds **1** and **2** were mounted on a Kapton loop using a Paratone N oil. An APEX II CCD BRUKER detector and a graphite Mo- $K\alpha$  monochromator were used for the data acquisition. All measurements were done at 150 K and a refinement method was used for solving the structure. The structure resolution was accomplished using the SHELXT-2014 [26] program and the refinement was done with the SHELXL-2014/7 [27] program. The structure solution and the refinement were achieved with the PLATON software [28]. Finally, ORTEP of the compounds were obtained using the MERCURY software [29]. During the refinement steps, all atoms- except hydrogens- were refined anisotropically. The position of the hydrogens was determined using residual electronic densities which are calculated by a Fourier difference. Finally, in order to obtain a complete refinement, a weighting step followed by multiples loops of refinement was done. Details on crystal data and structure refinements are summarized in Table S1 in the supplementary materials. CIF files are deposited at the Cambridge Data Base Centre under the reference CCDC numbers 1852482–1852483.

**Table S1.** Selected Crystal Data Collection Parameters for **1** and **2**.

|                                                  | <b>1</b>                                                             | <b>2</b>                                                                                           |
|--------------------------------------------------|----------------------------------------------------------------------|----------------------------------------------------------------------------------------------------|
| Formula                                          | C <sub>38</sub> H <sub>55</sub> O Sm                                 | C <sub>70</sub> H <sub>94</sub> O <sub>4</sub> Sm <sub>2</sub> , 2(C <sub>7</sub> H <sub>8</sub> ) |
| Crystal size (mm)                                | 0.240x0.140x0.080                                                    | 0.360x0.060x0.020                                                                                  |
| Crystal system                                   | Triclinic                                                            | Monoclinic                                                                                         |
| Space group                                      | P -1                                                                 | C 2/c                                                                                              |
| Volume (Å <sup>3</sup> )                         | 1751.15(8)                                                           | 7622.3(10)                                                                                         |
| a (Å)                                            | 10.0433(3)                                                           | 26.008(2)                                                                                          |
| b (Å)                                            | 11.0189(2)                                                           | 11.2284(9)                                                                                         |
| c (Å)                                            | 16.2612(4)                                                           | 27.4919(19)                                                                                        |
| α (deg)                                          | 95.701(1)                                                            | 90                                                                                                 |
| β (deg)                                          | 101.441(1)                                                           | 108.302(4)                                                                                         |
| γ (deg)                                          | 92.611(1)                                                            | 90                                                                                                 |
| Z                                                | 2                                                                    | 4                                                                                                  |
| Formula weight –g/mol)                           | 678.17                                                               | 1484.41                                                                                            |
| Density (calcd) (g/cm <sup>-3</sup> )            | 1.286                                                                | 1.294                                                                                              |
| Absorption coefficient (mm <sup>-1</sup> )       | 0.1702                                                               | 0.1572                                                                                             |
| F(000)                                           | 706                                                                  | 3080                                                                                               |
| Temp (K)                                         | 150                                                                  | 150                                                                                                |
| diffractometer <sup>a</sup>                      | Kappa APEX II CCD                                                    | Kappa APEX II CCD                                                                                  |
| θ range for data collection (deg)                | 2.3769 – 25.7179                                                     | 2.6843 – 25.0311                                                                                   |
| Transmission range                               | /                                                                    | /                                                                                                  |
| Absorption correction                            | Multi-scan; T <sub>min</sub> : 0.6424<br>/ T <sub>max</sub> : 0.7456 | Multi-scan; T <sub>min</sub> :<br>0.6680 / T <sub>max</sub> : 0.7452                               |
| Total no. reflections                            | 12600                                                                | 12600                                                                                              |
| Unique reflections [R <sub>int</sub> ]           | 6033 [0.0413]                                                        | 6033 [0.0413]                                                                                      |
| Final R <sup>b</sup> indices [I>2σ(I)]           | R = 0.0281, R <sub>w</sub> = 0.0700                                  | R = 0.0534, R <sub>w</sub> = 0.1259                                                                |
| R indices (all data)                             | R = 0.0335, R <sub>w</sub> = 0.0732                                  | R = 0.0659, R <sub>w</sub> = 0.1307                                                                |
| Largest diff. peak and hole (e.Å <sup>-3</sup> ) | 0.568(0.068) / -<br>0.411(0.068)                                     | 1.077(0.111) / -<br>2.131(0.111)                                                                   |
| GooF                                             | 1.041                                                                | 1.189                                                                                              |

<sup>a</sup>Radiation: graphite monochromated Mo Kα (λ = 0.71073 Å). <sup>b</sup>R = Σ ||F<sub>o</sub>| - |F<sub>c</sub>|| / Σ |F<sub>o</sub>|.

**Table S2.** Bond length (in Å) and angles (in °) for **1**.

|                  |          |                   |          |
|------------------|----------|-------------------|----------|
| Sm(1)–C(1)       | 2.450(3) | Sm(1)–O(1)        | 2.504(2) |
| Sm(1)–C(23)      | 2.685(3) | Sm(1)–C(13)       | 2.703(3) |
| Sm(1)–C(24)      | 2.705(3) | Sm(1)–C(9)        | 2.711(3) |
| Sm(1)–C(22)      | 2.748(3) | Sm(1)–C(26)       | 2.773(3) |
| Sm(1)–C(12)      | 2.777(3) | Sm(1)–C(25)       | 2.790(3) |
| Sm(1)–C(11)      | 2.794(3) | Sm(1)–C(10)       | 2.807(3) |
| O(1)–C(38)       | 1.437(4) | O(1)–C(35)        | 1.445(4) |
| C(1)–C(2)        | 1.202(4) | C(2)–C(3)         | 1.438(4) |
| C(3)–C(8)        | 1.378(4) | C(3)–C(4)         | 1.387(5) |
| C(4)–C(5)        | 1.382(5) | C(4)–H(4)         | 0.9500   |
| C(5)–C(6)        | 1.352(6) | C(5)–H(5)         | 0.9500   |
| C(6)–C(7)        | 1.350(5) | C(6)–H(6)         | 0.9500   |
| C(7)–C(8)        | 1.373(5) | C(7)–H(7)         | 0.9500   |
| C(8)–H(8)        | 0.9500   | C(9)–C(10)        | 1.406(4) |
| C(9)–C(13)       | 1.407(4) | C(9)–H(9)         | 0.9500   |
| C(10)–C(11)      | 1.412(4) | C(10)–C(14)       | 1.524(4) |
| C(11)–C(12)      | 1.419(4) | C(11)–H(11)       | 0.9500   |
| C(12)–C(13)      | 1.409(5) | C(12)–C(18)       | 1.522(4) |
| C(13)–H(13)      | 0.9500   | C(14)–C(16)       | 1.512(5) |
| C(14)–C(15)      | 1.526(5) | C(14)–C(17)       | 1.540(5) |
| C(15)–H(15A)     | 0.9800   | C(15)–H(15B)      | 0.9800   |
| C(15)–H(15C)     | 0.9800   | C(16)–H(16A)      | 0.9800   |
| C(16)–H(16B)     | 0.9800   | C(16)–H(16C)      | 0.9800   |
| C(17)–H(17A)     | 0.9800   | C(17)–H(17B)      | 0.9800   |
| C(17)–H(17C)     | 0.9800   | C(18)–C(21)       | 1.505(5) |
| C(18)–C(20)      | 1.521(5) | C(18)–C(19)       | 1.539(5) |
| C(19)–H(19A)     | 0.9800   | C(19)–H(19B)      | 0.9800   |
| C(19)–H(19C)     | 0.9800   | C(20)–H(20A)      | 0.9800   |
| C(20)–H(20B)     | 0.9800   | C(20)–H(20C)      | 0.9800   |
| C(21)–H(21A)     | 0.9800   | C(21)–H(21B)      | 0.9800   |
| C(21)–H(21C)     | 0.9800   | C(22)–C(23)       | 1.400(4) |
| C(22)–C(26)      | 1.409(4) | C(22)–C(27)       | 1.528(5) |
| C(23)–C(24)      | 1.398(4) | C(23)–H(23)       | 0.9500   |
| C(24)–C(25)      | 1.405(4) | C(24)–H(24)       | 0.9500   |
| C(25)–C(26)      | 1.410(5) | C(25)–C(31)       | 1.518(5) |
| C(26)–H(26)      | 0.9500   | C(27)–C(30)       | 1.511(6) |
| C(27)–C(29)      | 1.513(6) | C(27)–C(28)       | 1.530(5) |
| C(28)–H(28A)     | 0.9800   | C(28)–H(28B)      | 0.9800   |
| C(28)–H(28C)     | 0.9800   | C(29)–H(29A)      | 0.9800   |
| C(29)–H(29B)     | 0.9800   | C(29)–H(29C)      | 0.9800   |
| C(30)–H(30A)     | 0.9800   | C(30)–H(30B)      | 0.9800   |
| C(30)–H(30C)     | 0.9800   | C(31)–C(32)       | 1.515(5) |
| C(31)–C(33)      | 1.519(6) | C(31)–C(34)       | 1.524(5) |
| C(32)–H(32A)     | 0.9800   | C(32)–H(32B)      | 0.9800   |
| C(32)–H(32C)     | 0.9800   | C(33)–H(33A)      | 0.9800   |
| C(33)–H(33B)     | 0.9800   | C(33)–H(33C)      | 0.9800   |
| C(34)–H(34A)     | 0.9800   | C(34)–H(34B)      | 0.9800   |
| C(34)–H(34C)     | 0.9800   | C(35)–C(36)       | 1.487(6) |
| C(35)–H(35A)     | 0.9900   | C(35)–H(35B)      | 0.9900   |
| C(36)–C(37)      | 1.425(7) | C(36)–H(36A)      | 0.9900   |
| C(36)–H(36B)     | 0.9900   | C(37)–C(38)       | 1.412(6) |
| C(37)–H(37A)     | 0.9900   | C(37)–H(37B)      | 0.9900   |
| C(38)–H(38A)     | 0.9900   | C(38)–H(38B)      | 0.9900   |
| C(1)–Sm(1)–O(1)  | 85.0(1)  | C(1)–Sm(1)–C(23)  | 115.4(1) |
| O(1)–Sm(1)–C(23) | 136.1(1) | C(1)–Sm(1)–C(13)  | 116.8(1) |
| O(1)–Sm(1)–C(13) | 129.1(1) | C(23)–Sm(1)–C(13) | 78.1(1)  |

|                        |            |                         |            |
|------------------------|------------|-------------------------|------------|
| C (1) –Sm (1) –C (24)  | 129.6 (1)  | O (1) –Sm (1) –C (24)   | 106.7 (1)  |
| C (23) –Sm (1) –C (24) | 30.1 (1)   | C (13) –Sm (1) –C (24)  | 93.7 (1)   |
| C (1) –Sm (1) –C (9)   | 88.1 (1)   | O (1) –Sm (1) –C (9)    | 121.91 (8) |
| C (23) –Sm (1) –C (9)  | 98.4 (1)   | C (13) –Sm (1) –C (9)   | 30.1 (1)   |
| C (24) –Sm (1) –C (9)  | 121.2 (1)  | C (1) –Sm (1) –C (22)   | 86.2 (1)   |
| O (1) –Sm (1) –C (22)  | 132.1 (1)  | C (23) –Sm (1) –C (22)  | 29.8 (1)   |
| C (13) –Sm (1) –C (22) | 96.6 (1)   | C (24) –Sm (1) –C (22)  | 49.2 (1)   |
| C (9) –Sm (1) –C (22)  | 104.7 (1)  | C (1) –Sm (1) –C (26)   | 81.3 (1)   |
| O (1) –Sm (1) –C (26)  | 102.55 (8) | C (23) –Sm (1) –C (26)  | 48.7 (1)   |
| C (13) –Sm (1) –C (26) | 124.9 (1)  | C (24) –Sm (1) –C (26)  | 48.4 (1)   |
| C (9) –Sm (1) –C (26)  | 133.1 (1)  | C (22) –Sm (1) –C (26)  | 29.6 (1)   |
| C (1) –Sm (1) –C (12)  | 133.7 (1)  | O (1) –Sm (1) –C (12)   | 101.62 (8) |
| C (23) –Sm (1) –C (12) | 91.4 (1)   | C (13) –Sm (1) –C (12)  | 29.8 (1)   |
| C (24) –Sm (1) –C (12) | 92.7 (1)   | C (9) –Sm (1) –C (12)   | 49.4 (1)   |
| C (22) –Sm (1) –C (12) | 117.9 (1)  | C (26) –Sm (1) –C (12)  | 138.9 (1)  |
| C (1) –Sm (1) –C (25)  | 105.9 (1)  | O (1) –Sm (1) –C (25)   | 88.8 (1)   |
| C (23) –Sm (1) –C (25) | 49.3 (1)   | C (13) –Sm (1) –C (25)  | 123.0 (1)  |
| C (24) –Sm (1) –C (25) | 29.6 (1)   | C (9) –Sm (1) –C (25)   | 147.7 (1)  |
| C (22) –Sm (1) –C (25) | 49.2 (1)   | C (26) –Sm (1) –C (25)  | 29.4 (1)   |
| C (12) –Sm (1) –C (25) | 119.9 (1)  | C (1) –Sm (1) –C (11)   | 110.9 (1)  |
| O (1) –Sm (1) –C (11)  | 81.40 (8)  | C (23) –Sm (1) –C (11)  | 120.8 (1)  |
| C (13) –Sm (1) –C (11) | 48.4 (1)   | C (24) –Sm (1) –C (11)  | 119.3 (1)  |
| C (9) –Sm (1) –C (11)  | 48.3 (1)   | C (22) –Sm (1) –C (11)  | 144.8 (1)  |
| C (26) –Sm (1) –C (11) | 167.6 (1)  | C (12) –Sm (1) –C (11)  | 29.50 (8)  |
| C (25) –Sm (1) –C (11) | 140.8 (1)  | C (1) –Sm (1) –C (10)   | 85.2 (1)   |
| O (1) –Sm (1) –C (10)  | 92.46 (8)  | C (23) –Sm (1) –C (10)  | 126.0 (1)  |
| C (13) –Sm (1) –C (10) | 49.0 (1)   | C (24) –Sm (1) –C (10)  | 140.6 (1)  |
| C (9) –Sm (1) –C (10)  | 29.5 (1)   | C (22) –Sm (1) –C (10)  | 133.4 (1)  |
| C (26) –Sm (1) –C (10) | 158.7 (1)  | C (12) –Sm (1) –C (10)  | 49.1 (1)   |
| C (25) –Sm (1) –C (10) | 169.0 (1)  | C (11) –Sm (1) –C (10)  | 29.2 (1)   |
| C (38) –O (1) –C (35)  | 107.5 (3)  | C (38) –O (1) –Sm (1)   | 128.0 (2)  |
| C (35) –O (1) –Sm (1)  | 123.9 (2)  | C (2) –C (1) –Sm (1)    | 175.5 (3)  |
| C (1) –C (2) –C (3)    | 177.9 (4)  | C (8) –C (3) –C (4)     | 117.1 (3)  |
| C (8) –C (3) –C (2)    | 121.2 (3)  | C (4) –C (3) –C (2)     | 121.8 (3)  |
| C (5) –C (4) –C (3)    | 120.1 (4)  | C (5) –C (4) –H (4)     | 120.0      |
| C (3) –C (4) –H (4)    | 120.0      | C (6) –C (5) –C (4)     | 121.2 (4)  |
| C (6) –C (5) –H (5)    | 119.4      | C (4) –C (5) –H (5)     | 119.4      |
| C (7) –C (6) –C (5)    | 119.6 (3)  | C (7) –C (6) –H (6)     | 120.2      |
| C (5) –C (6) –H (6)    | 120.2      | C (6) –C (7) –C (8)     | 120.1 (4)  |
| C (6) –C (7) –H (7)    | 119.9      | C (8) –C (7) –H (7)     | 119.9      |
| C (7) –C (8) –C (3)    | 121.9 (3)  | C (7) –C (8) –H (8)     | 119.1      |
| C (3) –C (8) –H (8)    | 119.1      | C (10) –C (9) –C (13)   | 108.9 (3)  |
| C (10) –C (9) –Sm (1)  | 79.1 (2)   | C (13) –C (9) –Sm (1)   | 74.6 (2)   |
| C (10) –C (9) –H (9)   | 125.6      | C (13) –C (9) –H (9)    | 125.6      |
| Sm (1) –C (9) –H (9)   | 113.0      | C (9) –C (10) –C (11)   | 106.1 (3)  |
| C (9) –C (10) –C (14)  | 127.3 (3)  | C (11) –C (10) –C (14)  | 125.9 (3)  |
| C (9) –C (10) –Sm (1)  | 71.5 (2)   | C (11) –C (10) –Sm (1)  | 74.9 (2)   |
| C (14) –C (10) –Sm (1) | 126.2 (2)  | C (10) –C (11) –C (12)  | 110.2 (3)  |
| C (10) –C (11) –Sm (1) | 75.9 (2)   | C (12) –C (11) –Sm (1)  | 74.6 (2)   |
| C (10) –C (11) –H (11) | 124.9      | C (12) –C (11) –H (11)  | 124.9      |
| Sm (1) –C (11) –H (11) | 116.4      | C (13) –C (12) –C (11)  | 105.7 (3)  |
| C (13) –C (12) –C (18) | 128.3 (3)  | C (11) –C (12) –C (18)  | 125.3 (3)  |
| C (13) –C (12) –Sm (1) | 72.2 (2)   | C (11) –C (12) –Sm (1)  | 75.9 (2)   |
| C (18) –C (12) –Sm (1) | 124.2 (2)  | C (9) –C (13) –C (12)   | 109.1 (3)  |
| C (9) –C (13) –Sm (1)  | 75.3 (2)   | C (12) –C (13) –Sm (1)  | 78.1 (2)   |
| C (9) –C (13) –H (13)  | 125.5      | C (12) –C (13) –H (13)  | 125.5      |
| Sm (1) –C (13) –H (13) | 113.4      | C (16) –C (14) –C (10)  | 111.1 (3)  |
| C (16) –C (14) –C (15) | 109.9 (3)  | C (10) –C (14) –C (15)  | 111.3 (3)  |
| C (16) –C (14) –C (17) | 108.9 (3)  | C (10) –C (14) –C (17)  | 107.5 (3)  |
| C (15) –C (14) –C (17) | 108.1 (3)  | C (14) –C (15) –H (15A) | 109.5      |

|                          |           |                          |           |
|--------------------------|-----------|--------------------------|-----------|
| C (14) -C (15) -H (15B)  | 109.5     | H (15A) -C (15) -H (15B) | 109.5     |
| C (14) -C (15) -H (15C)  | 109.5     | H (15A) -C (15) -H (15C) | 109.5     |
| H (15B) -C (15) -H (15C) | 109.5     | C (14) -C (16) -H (16A)  | 109.5     |
| C (14) -C (16) -H (16B)  | 109.5     | H (16A) -C (16) -H (16B) | 109.5     |
| C (14) -C (16) -H (16C)  | 109.5     | H (16A) -C (16) -H (16C) | 109.5     |
| H (16B) -C (16) -H (16C) | 109.5     | C (14) -C (17) -H (17A)  | 109.5     |
| C (14) -C (17) -H (17B)  | 109.5     | H (17A) -C (17) -H (17B) | 109.5     |
| C (14) -C (17) -H (17C)  | 109.5     | H (17A) -C (17) -H (17C) | 109.5     |
| H (17B) -C (17) -H (17C) | 109.5     | C (21) -C (18) -C (20)   | 108.7 (3) |
| C (21) -C (18) -C (12)   | 111.8 (3) | C (20) -C (18) -C (12)   | 110.6 (3) |
| C (21) -C (18) -C (19)   | 108.9 (3) | C (20) -C (18) -C (19)   | 109.1 (3) |
| C (12) -C (18) -C (19)   | 107.7 (3) | C (18) -C (19) -H (19A)  | 109.5     |
| C (18) -C (19) -H (19B)  | 109.5     | H (19A) -C (19) -H (19B) | 109.5     |
| C (18) -C (19) -H (19C)  | 109.5     | H (19A) -C (19) -H (19C) | 109.5     |
| H (19B) -C (19) -H (19C) | 109.5     | C (18) -C (20) -H (20A)  | 109.5     |
| C (18) -C (20) -H (20B)  | 109.5     | H (20A) -C (20) -H (20B) | 109.5     |
| C (18) -C (20) -H (20C)  | 109.5     | H (20A) -C (20) -H (20C) | 109.5     |
| H (20B) -C (20) -H (20C) | 109.5     | C (18) -C (21) -H (21A)  | 109.5     |
| C (18) -C (21) -H (21B)  | 109.5     | H (21A) -C (21) -H (21B) | 109.5     |
| C (18) -C (21) -H (21C)  | 109.5     | H (21A) -C (21) -H (21C) | 109.5     |
| H (21B) -C (21) -H (21C) | 109.5     | C (23) -C (22) -C (26)   | 106.6 (3) |
| C (23) -C (22) -C (27)   | 125.9 (3) | C (26) -C (22) -C (27)   | 127.2 (3) |
| C (23) -C (22) -Sm (1)   | 72.6 (2)  | C (26) -C (22) -Sm (1)   | 76.2 (2)  |
| C (27) -C (22) -Sm (1)   | 122.1 (2) | C (24) -C (23) -C (22)   | 108.5 (3) |
| C (24) -C (23) -Sm (1)   | 75.8 (2)  | C (22) -C (23) -Sm (1)   | 77.6 (2)  |
| C (24) -C (23) -H (23)   | 125.7     | C (22) -C (23) -H (23)   | 125.7     |
| Sm (1) -C (23) -H (23)   | 113.2     | C (23) -C (24) -C (25)   | 109.2 (3) |
| C (23) -C (24) -Sm (1)   | 74.2 (2)  | C (25) -C (24) -Sm (1)   | 78.6 (2)  |
| C (23) -C (24) -H (24)   | 125.4     | C (25) -C (24) -H (24)   | 125.4     |
| Sm (1) -C (24) -H (24)   | 114.0     | C (24) -C (25) -C (26)   | 105.9 (3) |
| C (24) -C (25) -C (31)   | 126.1 (3) | C (26) -C (25) -C (31)   | 126.6 (3) |
| C (24) -C (25) -Sm (1)   | 71.8 (2)  | C (26) -C (25) -Sm (1)   | 74.7 (2)  |
| C (31) -C (25) -Sm (1)   | 128.7 (2) | C (22) -C (26) -C (25)   | 109.7 (3) |
| C (22) -C (26) -Sm (1)   | 74.2 (2)  | C (25) -C (26) -Sm (1)   | 76.0 (2)  |
| C (22) -C (26) -H (26)   | 125.1     | C (25) -C (26) -H (26)   | 125.1     |
| Sm (1) -C (26) -H (26)   | 116.5     | C (30) -C (27) -C (29)   | 109.2 (4) |
| C (30) -C (27) -C (22)   | 111.2 (3) | C (29) -C (27) -C (22)   | 108.3 (3) |
| C (30) -C (27) -C (28)   | 108.3 (3) | C (29) -C (27) -C (28)   | 108.5 (3) |
| C (22) -C (27) -C (28)   | 111.3 (3) | C (27) -C (28) -H (28A)  | 109.5     |
| C (27) -C (28) -H (28B)  | 109.5     | H (28A) -C (28) -H (28B) | 109.5     |
| C (27) -C (28) -H (28C)  | 109.5     | H (28A) -C (28) -H (28C) | 109.5     |
| H (28B) -C (28) -H (28C) | 109.5     | C (27) -C (29) -H (29A)  | 109.5     |
| C (27) -C (29) -H (29B)  | 109.5     | H (29A) -C (29) -H (29B) | 109.5     |
| C (27) -C (29) -H (29C)  | 109.5     | H (29A) -C (29) -H (29C) | 109.5     |
| H (29B) -C (29) -H (29C) | 109.5     | C (27) -C (30) -H (30A)  | 109.5     |
| C (27) -C (30) -H (30B)  | 109.5     | H (30A) -C (30) -H (30B) | 109.5     |
| C (27) -C (30) -H (30C)  | 109.5     | H (30A) -C (30) -H (30C) | 109.5     |
| H (30B) -C (30) -H (30C) | 109.5     | C (32) -C (31) -C (25)   | 111.7 (3) |
| C (32) -C (31) -C (33)   | 110.1 (4) | C (25) -C (31) -C (33)   | 112.2 (3) |
| C (32) -C (31) -C (34)   | 107.5 (3) | C (25) -C (31) -C (34)   | 106.6 (3) |
| C (33) -C (31) -C (34)   | 108.4 (3) | C (31) -C (32) -H (32A)  | 109.5     |
| C (31) -C (32) -H (32B)  | 109.5     | H (32A) -C (32) -H (32B) | 109.5     |
| C (31) -C (32) -H (32C)  | 109.5     | H (32A) -C (32) -H (32C) | 109.5     |
| H (32B) -C (32) -H (32C) | 109.5     | C (31) -C (33) -H (33A)  | 109.5     |
| C (31) -C (33) -H (33B)  | 109.5     | H (33A) -C (33) -H (33B) | 109.5     |
| C (31) -C (33) -H (33C)  | 109.5     | H (33A) -C (33) -H (33C) | 109.5     |
| H (33B) -C (33) -H (33C) | 109.5     | C (31) -C (34) -H (34A)  | 109.5     |
| C (31) -C (34) -H (34B)  | 109.5     | H (34A) -C (34) -H (34B) | 109.5     |
| C (31) -C (34) -H (34C)  | 109.5     | H (34A) -C (34) -H (34C) | 109.5     |
| H (34B) -C (34) -H (34C) | 109.5     | O (1) -C (35) -C (36)    | 104.0 (3) |

|                          |       |                         |           |
|--------------------------|-------|-------------------------|-----------|
| O (1) -C (35) -H (35A)   | 111.0 | C (36) -C (35) -H (35A) | 111.0     |
| O (1) -C (35) -H (35B)   | 111.0 | C (36) -C (35) -H (35B) | 111.0     |
| H (35A) -C (35) -H (35B) | 109.0 | C (37) -C (36) -C (35)  | 107.8 (4) |
| C (37) -C (36) -H (36A)  | 110.1 | C (35) -C (36) -H (36A) | 110.1     |
| C (37) -C (36) -H (36B)  | 110.1 | C (35) -C (36) -H (36B) | 110.1     |
| H (36A) -C (36) -H (36B) | 108.5 | C (38) -C (37) -C (36)  | 105.4 (4) |
| C (38) -C (37) -H (37A)  | 110.7 | C (36) -C (37) -H (37A) | 110.7     |
| C (38) -C (37) -H (37B)  | 110.7 | C (36) -C (37) -H (37B) | 110.7     |
| H (37A) -C (37) -H (37B) | 108.8 | C (37) -C (38) -O (1)   | 110.0 (4) |
| C (37) -C (38) -H (38A)  | 109.7 | O (1) -C (38) -H (38A)  | 109.7     |
| C (37) -C (38) -H (38B)  | 109.7 | O (1) -C (38) -H (38B)  | 109.7     |
| H (38A) -C (38) -H (38B) | 108.2 |                         |           |

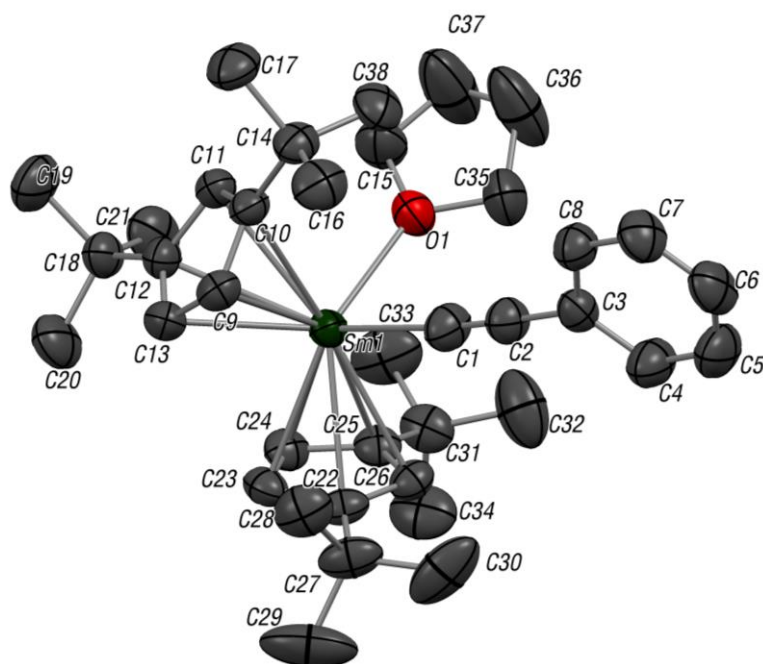

**Figure S3.** ORTEP of **1** with 50% probability ellipsoids (hydrogen atoms have been removed for clarity).

**Table S1.** Bond length (in Å) and angles (in °) for **2**.

|               |          |               |          |
|---------------|----------|---------------|----------|
| Sm(1)–O(1)    | 2.312(4) | Sm(1)–O(2)#2  | 2.315(5) |
| Sm(1)–C(13)   | 2.670(7) | Sm(1)–C(12)   | 2.696(7) |
| Sm(1)–C(25)   | 2.698(7) | Sm(1)–C(26)   | 2.700(7) |
| Sm(1)–C(14)   | 2.720(7) | Sm(1)–C(27)   | 2.747(7) |
| Sm(1)–C(24)   | 2.754(7) | Sm(1)–C(10)   | 2.759(7) |
| Sm(1)–C(11)   | 2.766(7) | Sm(1)–C(23)   | 2.777(7) |
| O(1)–C(1)     | 1.244(8) | O(2)–C(1)     | 1.266(8) |
| O(2)–Sm(1)#2  | 2.315(5) | C(1)–C(2)     | 1.45(1)  |
| C(2)–C(3)     | 1.21(1)  | C(3)–C(4)     | 1.43(1)  |
| C(4)–C(9)     | 1.38(1)  | C(4)–C(5)     | 1.39(1)  |
| C(5)–C(6)     | 1.38(1)  | C(5)–H(5)     | 0.9500   |
| C(6)–C(7)     | 1.40(1)  | C(6)–H(6)     | 0.9500   |
| C(7)–C(8)     | 1.38(1)  | C(7)–H(7)     | 0.9500   |
| C(8)–C(9)     | 1.38(1)  | C(8)–H(8)     | 0.9500   |
| C(9)–H(9)     | 0.9500   | C(10)–C(11)   | 1.41(1)  |
| C(10)–C(14)   | 1.42(1)  | C(10)–H(10)   | 0.9500   |
| C(11)–C(12)   | 1.42(1)  | C(11)–C(15)   | 1.52(1)  |
| C(12)–C(13)   | 1.39(1)  | C(12)–H(12)   | 0.9500   |
| C(13)–C(14)   | 1.40(1)  | C(13)–H(13)   | 0.9500   |
| C(14)–C(19)   | 1.52(1)  | C(15)–C(16)   | 1.52(1)  |
| C(15)–C(17)   | 1.53(1)  | C(15)–C(18)   | 1.55(1)  |
| C(16)–H(16A)  | 0.9800   | C(16)–H(16B)  | 0.9800   |
| C(16)–H(16C)  | 0.9800   | C(17)–H(17A)  | 0.9800   |
| C(17)–H(17B)  | 0.9800   | C(17)–H(17C)  | 0.9800   |
| C(18)–H(18A)  | 0.9800   | C(18)–H(18B)  | 0.9800   |
| C(18)–H(18C)  | 0.9800   | C(19)–C(21)   | 1.54(1)  |
| C(19)–C(20)   | 1.54(1)  | C(19)–C(22)   | 1.54(1)  |
| C(20)–H(20A)  | 0.9800   | C(20)–H(20B)  | 0.9800   |
| C(20)–H(20C)  | 0.9800   | C(21)–H(21A)  | 0.9800   |
| C(21)–H(21B)  | 0.9800   | C(21)–H(21C)  | 0.9800   |
| C(22)–H(22A)  | 0.9800   | C(22)–H(22B)  | 0.9800   |
| C(22)–H(22C)  | 0.9800   | C(23)–C(24)   | 1.41(1)  |
| C(23)–C(27)   | 1.43(1)  | C(23)–H(23)   | 0.9500   |
| C(24)–C(25)   | 1.41(1)  | C(24)–C(28)   | 1.54(1)  |
| C(25)–C(26)   | 1.41(1)  | C(25)–H(25)   | 0.9500   |
| C(26)–C(27)   | 1.41(1)  | C(26)–H(26)   | 0.9500   |
| C(27)–C(32)   | 1.53(1)  | C(28)–C(29)   | 1.53(1)  |
| C(28)–C(30)   | 1.53(1)  | C(28)–C(31)   | 1.54(1)  |
| C(29)–H(29A)  | 0.9800   | C(29)–H(29B)  | 0.9800   |
| C(29)–H(29C)  | 0.9800   | C(30)–H(30A)  | 0.9800   |
| C(30)–H(30B)  | 0.9800   | C(30)–H(30C)  | 0.9800   |
| C(31)–H(31A)  | 0.9800   | C(31)–H(31B)  | 0.9800   |
| C(31)–H(31C)  | 0.9800   | C(32)–C(35)   | 1.52(1)  |
| C(32)–C(33)   | 1.53(1)  | C(32)–C(34)   | 1.54(1)  |
| C(33)–H(33A)  | 0.9800   | C(33)–H(33B)  | 0.9800   |
| C(33)–H(33C)  | 0.9800   | C(34)–H(34A)  | 0.9800   |
| C(34)–H(34B)  | 0.9800   | C(34)–H(34C)  | 0.9800   |
| C(35)–H(35A)  | 0.9800   | C(35)–H(35B)  | 0.9800   |
| C(35)–H(35C)  | 0.9800   | C(36A)–C(37A) | 1.36(2)  |
| C(36A)–C(41A) | 1.41(2)  | C(36A)–H(36A) | 0.9500   |
| C(37A)–C(38A) | 1.35(2)  | C(37A)–H(37A) | 0.9500   |
| C(38A)–C(39A) | 1.42(2)  | C(38A)–H(38A) | 0.9500   |
| C(39A)–C(40A) | 1.36(2)  | C(39A)–H(39A) | 0.9500   |
| C(40A)–C(41A) | 1.37(2)  | C(40A)–H(40A) | 0.9500   |
| C(41A)–C(42A) | 1.52(2)  | C(42A)–H(42A) | 0.9800   |
| C(42A)–H(42B) | 0.9800   | C(42A)–H(42C) | 0.9800   |
| C(36B)–C(37B) | 1.3900   | C(36B)–C(41B) | 1.3900   |
| C(36B)–H(36B) | 0.9500   | C(37B)–C(38B) | 1.3900   |



|                         |           |                         |        |
|-------------------------|-----------|-------------------------|--------|
| C (37B) -H (37B)        | 0.9500    | C (38B) -C (39B)        | 1.3900 |
| C (38B) -H (38B)        | 0.9500    | C (39B) -C (40B)        | 1.3900 |
| C (39B) -H (39B)        | 0.9500    | C (40B) -C (41B)        | 1.3900 |
| C (40B) -C (42B)        | 1.50 (3)  | C (41B) -H (41B)        | 0.9500 |
| C (42B) -H (42D)        | 0.9800    | C (42B) -H (42E)        | 0.9800 |
| C (42B) -H (42F)        | 0.9800    |                         |        |
| O (1) -Sm (1) -O (2) #2 | 91.3 (2)  | O (1) -Sm (1) -C (13)   |        |
| 116.2 (2)               |           | O (1) -Sm (1) -C (12)   |        |
| O (2) #2-Sm (1) -C (13) | 130.4 (2) | C (13) -Sm (1) -C (12)  |        |
| 131.9 (2)               |           | O (2) #2-Sm (1) -C (25) |        |
| O (2) #2-Sm (1) -C (12) | 100.9 (2) | C (12) -Sm (1) -C (25)  |        |
| 30.1 (2)                |           | O (2) #2-Sm (1) -C (26) |        |
| O (1) -Sm (1) -C (25)   | 101.2 (2) | C (12) -Sm (1) -C (26)  |        |
| 131.4 (2)               |           | O (1) -Sm (1) -C (14)   |        |
| C (13) -Sm (1) -C (25)  | 85.2 (2)  | C (13) -Sm (1) -C (14)  |        |
| 104.6 (2)               |           | C (25) -Sm (1) -C (14)  |        |
| O (1) -Sm (1) -C (26)   | 131.0 (2) | O (1) -Sm (1) -C (27)   |        |
| 115.8 (2)               |           | C (13) -Sm (1) -C (27)  |        |
| C (13) -Sm (1) -C (26)  | 77.6 (2)  | C (25) -Sm (1) -C (27)  |        |
| 84.5 (2)                |           | C (14) -Sm (1) -C (27)  |        |
| C (25) -Sm (1) -C (26)  | 30.3 (2)  | O (2) #2-Sm (1) -C (24) |        |
| 87.0 (2)                |           | C (12) -Sm (1) -C (24)  |        |
| O (2) #2-Sm (1) -C (14) | 129.5 (2) | C (26) -Sm (1) -C (24)  |        |
| 30.1 (2)                |           | C (27) -Sm (1) -C (24)  |        |
| C (12) -Sm (1) -C (14)  | 49.8 (2)  | O (1) -Sm (1) -C (10)   |        |
| 98.2 (2)                |           | C (13) -Sm (1) -C (10)  |        |
| C (26) -Sm (1) -C (14)  | 102.5 (2) | C (25) -Sm (1) -C (10)  |        |
| 130.2 (2)               |           | C (14) -Sm (1) -C (10)  |        |
| O (2) #2-Sm (1) -C (27) | 86.6 (2)  | O (1) -Sm (1) -C (11)   |        |
| 102.1 (2)               |           | C (13) -Sm (1) -C (11)  |        |
| C (12) -Sm (1) -C (27)  | 97.1 (2)  | C (25) -Sm (1) -C (11)  |        |
| 49.8 (2)                |           | C (14) -Sm (1) -C (11)  |        |
| C (26) -Sm (1) -C (27)  | 30.0 (2)  | C (24) -Sm (1) -C (11)  |        |
| 130.5 (2)               |           |                         |        |
| O (1) -Sm (1) -C (24)   | 84.5 (2)  |                         |        |
| 107.7 (2)               |           |                         |        |
| C (13) -Sm (1) -C (24)  | 114.9 (2) |                         |        |
| 132.9 (2)               |           |                         |        |
| C (25) -Sm (1) -C (24)  | 29.9 (2)  |                         |        |
| 49.5 (2)                |           |                         |        |
| C (14) -Sm (1) -C (24)  | 122.3 (2) |                         |        |
| 49.6 (2)                |           |                         |        |
| O (1) -Sm (1) -C (10)   | 83.2 (2)  |                         |        |
| 99.6 (2)                |           |                         |        |
| C (13) -Sm (1) -C (10)  | 49.2 (2)  |                         |        |
| 49.0 (2)                |           |                         |        |
| C (25) -Sm (1) -C (10)  | 128.3 (2) |                         |        |
| 126.7 (2)               |           |                         |        |
| C (14) -Sm (1) -C (10)  | 30.1 (2)  |                         |        |
| 146.1 (2)               |           |                         |        |
| C (24) -Sm (1) -C (10)  | 150.2 (2) |                         |        |
| 108.4 (2)               |           |                         |        |
| O (2) #2-Sm (1) -C (11) | 83.7 (2)  |                         |        |
| 49.7 (2)                |           |                         |        |
| C (12) -Sm (1) -C (11)  | 30.1 (2)  |                         |        |
| 133.4 (2)               |           |                         |        |
| C (26) -Sm (1) -C (11)  | 114.3 (2) |                         |        |
| 49.8 (2)                |           |                         |        |
| C (27) -Sm (1) -C (11)  | 120.7 (2) |                         |        |

|                         |           |                         |       |
|-------------------------|-----------|-------------------------|-------|
| 162.9 (2)               |           |                         |       |
| C (10) -Sm (1) -C (11)  | 29.6 (2)  | O (1) -Sm (1) -C (23)   |       |
| 100.4 (2)               |           |                         |       |
| O (2) #2-Sm (1) -C (23) | 82.5 (2)  | C (13) -Sm (1) -C (23)  |       |
| 126.7 (2)               |           |                         |       |
| C (12) -Sm (1) -C (23)  | 127.1 (2) | C (25) -Sm (1) -C (23)  |       |
| 49.1 (2)                |           |                         |       |
| C (26) -Sm (1) -C (23)  | 49.2 (2)  | C (14) -Sm (1) -C (23)  |       |
| 147.3 (2)               |           |                         |       |
| C (27) -Sm (1) -C (23)  | 29.9 (2)  | C (24) -Sm (1) -C (23)  |       |
| 29.6 (2)                |           |                         |       |
| C (10) -Sm (1) -C (23)  | 175.8 (2) | C (11) -Sm (1) -C (23)  |       |
| 148.2 (2)               |           |                         |       |
| C (1) -O (1) -Sm (1)    | 166.4 (5) | C (1) -O (2) -Sm (1) #2 |       |
| 156.4 (5)               |           |                         |       |
| O (1) -C (1) -O (2)     | 124.9 (7) | O (1) -C (1) -C (2)     |       |
| 118.3 (6)               |           |                         |       |
| O (2) -C (1) -C (2)     | 116.9 (6) | C (3) -C (2) -C (1)     |       |
| 175.4 (8)               |           |                         |       |
| C (2) -C (3) -C (4)     | 179.0 (8) | C (9) -C (4) -C (5)     |       |
| 120.0 (8)               |           |                         |       |
| C (9) -C (4) -C (3)     | 119.6 (7) | C (5) -C (4) -C (3)     |       |
| 120.3 (7)               |           |                         |       |
| C (6) -C (5) -C (4)     | 120.2 (7) | C (6) -C (5) -H (5)     | 119.9 |
| C (4) -C (5) -H (5)     | 119.9     | C (5) -C (6) -C (7)     |       |
| 120.3 (8)               |           |                         |       |
| C (5) -C (6) -H (6)     | 119.8     | C (7) -C (6) -H (6)     | 119.8 |
| C (8) -C (7) -C (6)     | 119 (1)   | C (8) -C (7) -H (7)     | 120.7 |
| C (6) -C (7) -H (7)     | 120.7     | C (7) -C (8) -C (9)     |       |
| 121.5 (8)               |           |                         |       |
| C (7) -C (8) -H (8)     | 119.3     | C (9) -C (8) -H (8)     | 119.3 |
| C (8) -C (9) -C (4)     | 119.3 (8) | C (8) -C (9) -H (9)     | 120.3 |
| C (4) -C (9) -H (9)     | 120.3     | C (11) -C (10) -C (14)  |       |
| 109.3 (6)               |           |                         |       |
| C (11) -C (10) -Sm (1)  | 75.5 (4)  | C (14) -C (10) -Sm (1)  |       |
| 73.4 (4)                |           |                         |       |
| C (11) -C (10) -H (10)  | 125.3     | C (14) -C (10) -H (10)  | 125.3 |
| Sm (1) -C (10) -H (10)  | 117.6     | C (10) -C (11) -C (12)  |       |
| 106.3 (6)               |           |                         |       |
| C (10) -C (11) -C (15)  | 125.6 (6) | C (12) -C (11) -C (15)  |       |
| 126.6 (6)               |           |                         |       |
| C (10) -C (11) -Sm (1)  | 74.9 (4)  | C (12) -C (11) -Sm (1)  |       |
| 72.2 (4)                |           |                         |       |
| C (15) -C (11) -Sm (1)  | 129.0 (5) | C (13) -C (12) -C (11)  |       |
| 108.7 (6)               |           |                         |       |
| C (13) -C (12) -Sm (1)  | 73.9 (4)  | C (11) -C (12) -Sm (1)  |       |
| 77.7 (4)                |           |                         |       |
| C (13) -C (12) -H (12)  | 125.7     | C (11) -C (12) -H (12)  | 125.7 |
| Sm (1) -C (12) -H (12)  | 114.9     | C (12) -C (13) -C (14)  |       |
| 109.3 (6)               |           |                         |       |
| C (12) -C (13) -Sm (1)  | 76.0 (4)  | C (14) -C (13) -Sm (1)  |       |
| 76.9 (4)                |           |                         |       |
| C (12) -C (13) -H (13)  | 125.4     | C (14) -C (13) -H (13)  | 125.4 |
| Sm (1) -C (13) -H (13)  | 113.9     | C (13) -C (14) -C (10)  |       |
| 106.4 (7)               |           |                         |       |
| C (13) -C (14) -C (19)  | 126.0 (6) | C (10) -C (14) -C (19)  |       |
| 126.4 (6)               |           |                         |       |
| C (13) -C (14) -Sm (1)  | 73.0 (4)  | C (10) -C (14) -Sm (1)  |       |
| 76.5 (4)                |           |                         |       |
| C (19) -C (14) -Sm (1)  | 125.7 (4) | C (16) -C (15) -C (11)  |       |
| 111.3 (6)               |           |                         |       |

|                          |           |                          |       |
|--------------------------|-----------|--------------------------|-------|
| C (16) -C (15) -C (17)   | 110.2 (7) | C (11) -C (15) -C (17)   |       |
| 111.6 (6)                |           |                          |       |
| C (16) -C (15) -C (18)   | 108.2 (6) | C (11) -C (15) -C (18)   |       |
| 107.7 (7)                |           |                          |       |
| C (17) -C (15) -C (18)   | 107.8 (6) | C (15) -C (16) -H (16A)  | 109.5 |
| C (15) -C (16) -H (16B)  | 109.5     | H (16A) -C (16) -H (16B) | 109.5 |
| C (15) -C (16) -H (16C)  | 109.5     | H (16A) -C (16) -H (16C) | 109.5 |
| H (16B) -C (16) -H (16C) | 109.5     | C (15) -C (17) -H (17A)  | 109.5 |
| C (15) -C (17) -H (17B)  | 109.5     | H (17A) -C (17) -H (17B) | 109.5 |
| C (15) -C (17) -H (17C)  | 109.5     | H (17A) -C (17) -H (17C) | 109.5 |
| H (17B) -C (17) -H (17C) | 109.5     | C (15) -C (18) -H (18A)  | 109.5 |
| C (15) -C (18) -H (18B)  | 109.5     | H (18A) -C (18) -H (18B) | 109.5 |
| C (15) -C (18) -H (18C)  | 109.5     | H (18A) -C (18) -H (18C) | 109.5 |
| H (18B) -C (18) -H (18C) | 109.5     | C (14) -C (19) -C (21)   |       |
| 111.0 (6)                |           |                          |       |
| C (14) -C (19) -C (20)   | 112.1 (6) | C (21) -C (19) -C (20)   |       |
| 108.7 (6)                |           |                          |       |
| C (14) -C (19) -C (22)   | 106.7 (6) | C (21) -C (19) -C (22)   |       |
| 110.0 (6)                |           |                          |       |
| C (20) -C (19) -C (22)   | 108.2 (6) | C (19) -C (20) -H (20A)  | 109.5 |
| C (19) -C (20) -H (20B)  | 109.5     | H (20A) -C (20) -H (20B) | 109.5 |
| C (19) -C (20) -H (20C)  | 109.5     | H (20A) -C (20) -H (20C) | 109.5 |
| H (20B) -C (20) -H (20C) | 109.5     | C (19) -C (21) -H (21A)  | 109.5 |
| C (19) -C (21) -H (21B)  | 109.5     | H (21A) -C (21) -H (21B) | 109.5 |
| C (19) -C (21) -H (21C)  | 109.5     | H (21A) -C (21) -H (21C) | 109.5 |
| H (21B) -C (21) -H (21C) | 109.5     | C (19) -C (22) -H (22A)  | 109.5 |
| C (19) -C (22) -H (22B)  | 109.5     | H (22A) -C (22) -H (22B) | 109.5 |
| C (19) -C (22) -H (22C)  | 109.5     | H (22A) -C (22) -H (22C) | 109.5 |
| H (22B) -C (22) -H (22C) | 109.5     | C (24) -C (23) -C (27)   |       |
| 108.5 (7)                |           |                          |       |
| C (24) -C (23) -Sm (1)   | 74.3 (4)  | C (27) -C (23) -Sm (1)   |       |
| 73.9 (4)                 |           |                          |       |
| C (24) -C (23) -H (23)   | 125.7     | C (27) -C (23) -H (23)   | 125.7 |
| Sm (1) -C (23) -H (23)   | 118.0     | C (25) -C (24) -C (23)   |       |
| 107.6 (6)                |           |                          |       |
| C (25) -C (24) -C (28)   | 126.0 (7) | C (23) -C (24) -C (28)   |       |
| 125.3 (6)                |           |                          |       |
| C (25) -C (24) -Sm (1)   | 72.8 (4)  | C (23) -C (24) -Sm (1)   |       |
| 76.1 (4)                 |           |                          |       |
| C (28) -C (24) -Sm (1)   | 126.1 (4) | C (24) -C (25) -C (26)   |       |
| 108.3 (7)                |           |                          |       |
| C (24) -C (25) -Sm (1)   | 77.2 (4)  | C (26) -C (25) -Sm (1)   |       |
| 74.9 (4)                 |           |                          |       |
| C (24) -C (25) -H (25)   | 125.8     | C (26) -C (25) -H (25)   | 125.8 |
| Sm (1) -C (25) -H (25)   | 114.2     | C (25) -C (26) -C (27)   |       |
| 108.7 (6)                |           |                          |       |
| C (25) -C (26) -Sm (1)   | 74.8 (4)  | C (27) -C (26) -Sm (1)   |       |
| 76.8 (4)                 |           |                          |       |
| C (25) -C (26) -H (26)   | 125.7     | C (27) -C (26) -H (26)   | 125.7 |
| Sm (1) -C (26) -H (26)   | 114.9     | C (26) -C (27) -C (23)   |       |
| 106.9 (7)                |           |                          |       |
| C (26) -C (27) -C (32)   | 126.3 (7) | C (23) -C (27) -C (32)   |       |
| 125.9 (7)                |           |                          |       |
| C (26) -C (27) -Sm (1)   | 73.2 (4)  | C (23) -C (27) -Sm (1)   |       |
| 76.2 (4)                 |           |                          |       |
| C (32) -C (27) -Sm (1)   | 124.8 (5) | C (29) -C (28) -C (30)   |       |
| 109.9 (6)                |           |                          |       |
| C (29) -C (28) -C (24)   | 111.4 (6) | C (30) -C (28) -C (24)   |       |
| 111.2 (6)                |           |                          |       |
| C (29) -C (28) -C (31)   | 108.2 (6) | C (30) -C (28) -C (31)   |       |
| 108.1 (6)                |           |                          |       |

|                           |           |                           |       |
|---------------------------|-----------|---------------------------|-------|
| C (24) -C (28) -C (31)    | 108.0 (6) | C (28) -C (29) -H (29A)   | 109.5 |
| C (28) -C (29) -H (29B)   | 109.5     | H (29A) -C (29) -H (29B)  | 109.5 |
| C (28) -C (29) -H (29C)   | 109.5     | H (29A) -C (29) -H (29C)  | 109.5 |
| H (29B) -C (29) -H (29C)  | 109.5     | C (28) -C (30) -H (30A)   | 109.5 |
| C (28) -C (30) -H (30B)   | 109.5     | H (30A) -C (30) -H (30B)  | 109.5 |
| C (28) -C (30) -H (30C)   | 109.5     | H (30A) -C (30) -H (30C)  | 109.5 |
| H (30B) -C (30) -H (30C)  | 109.5     | C (28) -C (31) -H (31A)   | 109.5 |
| C (28) -C (31) -H (31B)   | 109.5     | H (31A) -C (31) -H (31B)  | 109.5 |
| C (28) -C (31) -H (31C)   | 109.5     | H (31A) -C (31) -H (31C)  | 109.5 |
| H (31B) -C (31) -H (31C)  | 109.5     | C (35) -C (32) -C (33)    |       |
| 109.9 (8)                 |           |                           |       |
| C (35) -C (32) -C (27)    | 111.4 (6) | C (33) -C (32) -C (27)    |       |
| 109.8 (7)                 |           |                           |       |
| C (35) -C (32) -C (34)    | 109.1 (7) | C (33) -C (32) -C (34)    |       |
| 109.4 (7)                 |           |                           |       |
| C (27) -C (32) -C (34)    | 107.1 (7) | C (32) -C (33) -H (33A)   | 109.5 |
| C (32) -C (33) -H (33B)   | 109.5     | H (33A) -C (33) -H (33B)  | 109.5 |
| C (32) -C (33) -H (33C)   | 109.5     | H (33A) -C (33) -H (33C)  | 109.5 |
| H (33B) -C (33) -H (33C)  | 109.5     | C (32) -C (34) -H (34A)   | 109.5 |
| C (32) -C (34) -H (34B)   | 109.5     | H (34A) -C (34) -H (34B)  | 109.5 |
| C (32) -C (34) -H (34C)   | 109.5     | H (34A) -C (34) -H (34C)  | 109.5 |
| H (34B) -C (34) -H (34C)  | 109.5     | C (32) -C (35) -H (35A)   | 109.5 |
| C (32) -C (35) -H (35B)   | 109.5     | H (35A) -C (35) -H (35B)  | 109.5 |
| C (32) -C (35) -H (35C)   | 109.5     | H (35A) -C (35) -H (35C)  | 109.5 |
| H (35B) -C (35) -H (35C)  | 109.5     | C (37A) -C (36A) -C (41A) |       |
| 120 (1)                   |           |                           |       |
| C (37A) -C (36A) -H (36A) | 120.0     | C (41A) -C (36A) -H (36A) | 120.0 |
| C (38A) -C (37A) -C (36A) | 120 (2)   | C (38A) -C (37A) -H (37A) | 120.2 |
| C (36A) -C (37A) -H (37A) | 120.2     | C (37A) -C (38A) -C (39A) |       |
| 122 (2)                   |           |                           |       |
| C (37A) -C (38A) -H (38A) | 119.2     | C (39A) -C (38A) -H (38A) | 119.2 |
| C (40A) -C (39A) -C (38A) | 119 (2)   | C (40A) -C (39A) -H (39A) | 120.7 |
| C (38A) -C (39A) -H (39A) | 120.7     | C (39A) -C (40A) -C (41A) |       |
| 120 (2)                   |           |                           |       |
| C (39A) -C (40A) -H (40A) | 119.8     | C (41A) -C (40A) -H (40A) | 119.8 |
| C (40A) -C (41A) -C (36A) | 120 (1)   | C (40A) -C (41A) -C (42A) |       |
| 117 (2)                   |           |                           |       |
| C (36A) -C (41A) -C (42A) | 123 (2)   | C (41A) -C (42A) -H (42A) | 109.5 |
| C (41A) -C (42A) -H (42B) | 109.5     | H (42A) -C (42A) -H (42B) | 109.5 |
| C (41A) -C (42A) -H (42C) | 109.5     | H (42A) -C (42A) -H (42C) | 109.5 |
| H (42B) -C (42A) -H (42C) | 109.5     | C (37B) -C (36B) -C (41B) | 120.0 |
| C (37B) -C (36B) -H (36B) | 120.0     | C (41B) -C (36B) -H (36B) | 120.0 |
| C (38B) -C (37B) -C (36B) | 120.0     | C (38B) -C (37B) -H (37B) | 120.0 |
| C (36B) -C (37B) -H (37B) | 120.0     | C (37B) -C (38B) -C (39B) | 120.0 |
| C (37B) -C (38B) -H (38B) | 120.0     | C (39B) -C (38B) -H (38B) | 120.0 |
| C (40B) -C (39B) -C (38B) | 120.0     | C (40B) -C (39B) -H (39B) | 120.0 |
| C (38B) -C (39B) -H (39B) | 120.0     | C (39B) -C (40B) -C (41B) | 120.0 |
| C (39B) -C (40B) -C (42B) | 109 (3)   | C (41B) -C (40B) -C (42B) |       |
| 131 (3)                   |           |                           |       |
| C (40B) -C (41B) -C (36B) | 120.0     | C (40B) -C (41B) -H (41B) | 120.0 |
| C (36B) -C (41B) -H (41B) | 120.0     | C (40B) -C (42B) -H (42D) | 109.5 |
| C (40B) -C (42B) -H (42E) | 109.5     | H (42D) -C (42B) -H (42E) | 109.5 |
| C (40B) -C (42B) -H (42F) | 109.5     | H (42D) -C (42B) -H (42F) | 109.5 |
| H (42E) -C (42B) -H (42F) | 109.5     |                           |       |

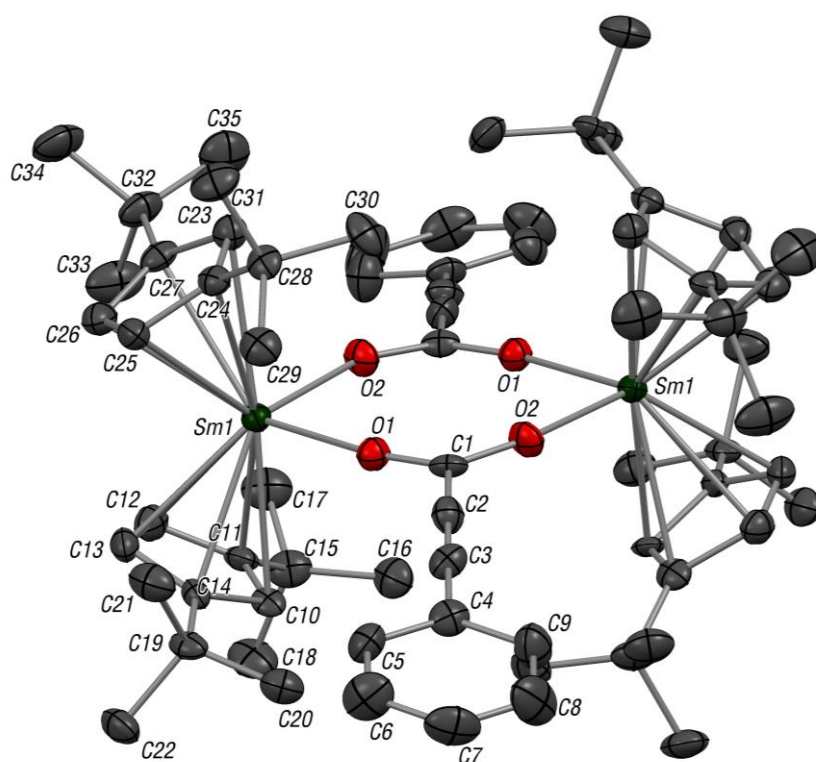

**Figure S4.** ORTEP of **2** with 50% probability ellipsoids (hydrogen atoms and one molecule of toluene have been removed for clarity).

### III. References

26. Sheldrick, G. M. Crystal structure refinement with SHELXL. *Acta Cryst. C*, **2015**, *71*, 3-8, DOI: 10.1107/S2053229614024218.
27. Sheldrick, G. M. SHELXT – Integrated space-group and crystal-structure determination. *Acta Cryst. A, Foundations and advances*, **2015**, *71*, 3-8, DOI: 10.1107/S2053273314026370.
28. Spek, A. L. Single-crystal structure validation with the program PLATON. *J. Appl. Cryst.*, **2003**, *36*, 7-13, DOI: 10.1107/S0021889802022112.
29. Macrae, C. F.; Bruno, I. J.; Chisholm, J. A.; Edgington, P. R.; McCabe, P. ; Pidcock, E. ; Rodriguez-Monge, L. ; Taylor, R. ; Van De Streek, J. ; Wood, P. A. Mercury CSD 2.0– new features for the visualization and investigation of crystal structures. *J. Appl. Cryst.*, 2008, *41*, 466-470. DOI:10.1107/S0021889807067908.
