# Supplementary material
Source: MDPI journal article supplement (https://www.mdpi.com/2304-6740/6/3/82)
Supplement: s1 [file s1]

# checkCIF (basic structural check) running

Checking for embedded fcf data in CIF ...

Found embedded fcf data in CIF. Extracting fcf data from uploaded CIF, please wait .....

## checkCIF/PLATON (basic structural check)

Structure factors have been supplied for datablock(s) 1, 2

THIS REPORT IS FOR GUIDANCE ONLY. IF USED AS PART OF A REVIEW PROCEDURE FOR PUBLICATION, IT SHOULD NOT REPLACE THE EXPERTISE OF AN EXPERIENCED CRYSTALLOGRAPHIC REFEREE.

No syntax errors found.

Please wait while processing ....

[CIF dictionary](#)

[Interpreting this report](#)

[Structure factor report](#)

### Datablock: 1

|                 |                                                       |                    |
|-----------------|-------------------------------------------------------|--------------------|
| Bond precision: | C-C = 0.0052 Å                                        | Wavelength=0.71069 |
| Cell:           | a=10.0433(3)    b=11.0189(2)    c=16.2612(4)          |                    |
|                 | alpha=95.701(1)    beta=101.441(1)    gamma=92.611(1) |                    |
| Temperature:    | 150 K                                                 |                    |

  

|                        | Calculated   | Reported     |
|------------------------|--------------|--------------|
| Volume                 | 1751.15(8)   | 1751.15(8)   |
| Space group            | P -1         | P -1         |
| Hall group             | -P 1         | -P 1         |
| Moiety formula         | C38 H55 O Sm | C38 H55 O Sm |
| Sum formula            | C38 H55 O Sm | C38 H55 O Sm |
| Mr                     | 678.18       | 678.17       |
| Dx, g cm <sup>-3</sup> | 1.286        | 1.286        |
| Z                      | 2            | 2            |
| Mu (mm <sup>-1</sup> ) | 1.702        | 1.702        |
| F000                   | 706.0        | 706.0        |
| F000'                  | 705.86       |              |
| h, k, lmax             | 12, 13, 19   | 12, 13, 19   |
| Nref                   | 6646         | 6598         |
| Tmin, Tmax             | 0.751, 0.873 | 0.642, 0.746 |
| Tmin'                  | 0.665        |              |

Correction method= # Reported T Limits: Tmin=0.642  
Tmax=0.746 AbsCorr = MULTI-SCAN

Data completeness= 0.993      Theta(max)= 25.679

R(reflections)= 0.0281( 5903)      wR2(reflections)= 0.0732( 6598)

S = 1.041      Npar= 373

The following ALERTS were generated. Each ALERT has the format

**test-name\_ALERT\_alert-type\_alert-level.**

Click on the hyperlinks for more details of the test.

 **Alert level C**

|                                   |                                                |                         |           |
|-----------------------------------|------------------------------------------------|-------------------------|-----------|
| <a href="#">PLAT220_ALERT_2_C</a> | Non-Solvent Resd 1 C                           | Ueq(max)/Ueq(min) Range | 3.1 Ratio |
| <a href="#">PLAT230_ALERT_2_C</a> | Hirshfeld Test Diff for C18                    | --C21 .                 | 5.7 s.u.  |
| <a href="#">PLAT230_ALERT_2_C</a> | Hirshfeld Test Diff for C35                    | --C36 .                 | 5.6 s.u.  |
| <a href="#">PLAT241_ALERT_2_C</a> | High 'MainMol' Ueq as Compared to Neighbors of | C36                     | Check     |
| <a href="#">PLAT241_ALERT_2_C</a> | High 'MainMol' Ueq as Compared to Neighbors of | C37                     | Check     |
| <a href="#">PLAT242_ALERT_2_C</a> | Low 'MainMol' Ueq as Compared to Neighbors of  | C18                     | Check     |

**And 3 other PLAT242 Alerts**

|                                   |                                               |     |       |
|-----------------------------------|-----------------------------------------------|-----|-------|
| <a href="#">PLAT242_ALERT_2_C</a> | Low 'MainMol' Ueq as Compared to Neighbors of | C27 | Check |
| <a href="#">PLAT242_ALERT_2_C</a> | Low 'MainMol' Ueq as Compared to Neighbors of | C31 | Check |
| <a href="#">PLAT242_ALERT_2_C</a> | Low 'MainMol' Ueq as Compared to Neighbors of | C38 | Check |

|                                   |                                                  |         |           |
|-----------------------------------|--------------------------------------------------|---------|-----------|
| <a href="#">PLAT360_ALERT_2_C</a> | Short C(sp3)-C(sp3) Bond C36                     | - C37 . | 1.42 Ang. |
| <a href="#">PLAT360_ALERT_2_C</a> | Short C(sp3)-C(sp3) Bond C37                     | - C38 . | 1.41 Ang. |
| <a href="#">PLAT910_ALERT_3_C</a> | Missing # of FCF Reflection(s) Below Theta(Min). |         | 8 Note    |
| <a href="#">PLAT911_ALERT_3_C</a> | Missing FCF Refl Between Thmin & STh/L=          | 0.600   | 29 Report |
| <a href="#">PLAT978_ALERT_2_C</a> | Number C-C Bonds with Positive Residual Density. |         | 0 Info    |

**Alert level G**

|                                   |                                                  |              |
|-----------------------------------|--------------------------------------------------|--------------|
| <a href="#">PLAT154_ALERT_1_G</a> | The s.u.'s on the Cell Angles are Equal ..(Note) | 0.001 Degree |
| <a href="#">PLAT371_ALERT_2_G</a> | Long C(sp2)-C(sp1) Bond C2 - C3 .                | 1.44 Ang.    |
| <a href="#">PLAT912_ALERT_4_G</a> | Missing # of FCF Reflections Above STh/L= 0.600  | 11 Note      |
| <a href="#">PLAT933_ALERT_2_G</a> | Number of OMIT Records in Embedded .res File ... | 7 Note       |

- 0 **ALERT level A** = Most likely a serious problem - resolve or explain  
0 **ALERT level B** = A potentially serious problem, consider carefully  
14 **ALERT level C** = Check. Ensure it is not caused by an omission or oversight  
4 **ALERT level G** = General information/check it is not something unexpected

- 1 ALERT type 1 CIF construction/syntax error, inconsistent or missing data  
14 ALERT type 2 Indicator that the structure model may be wrong or deficient  
2 ALERT type 3 Indicator that the structure quality may be low  
1 ALERT type 4 Improvement, methodology, query or suggestion  
0 ALERT type 5 Informative message, check

**Datablock: 2**

|                    |                                        |                                 |
|--------------------|----------------------------------------|---------------------------------|
| Bond precision:    | C-C = 0.0116 A                         | Wavelength=0.71069              |
| Cell:              | a=26.008(2) b=11.2284(9) c=27.4919(19) |                                 |
|                    | alpha=90 beta=108.302(4) gamma=90      |                                 |
| Temperature: 150 K |                                        |                                 |
|                    | Calculated                             | Reported                        |
| Volume             | 7622.3(10)                             | 7622.3(10)                      |
| Space group        | C 2/c                                  | C 2/c                           |
| Hall group         | -C 2yc                                 | -C 2yc                          |
| Moiety formula     | C70 H94 O4 Sm2, 2(C7 H8)               | C70 H94 O4 Sm2, 2(C7 H8)        |
| Sum formula        | C84 H110 O4 Sm2                        | C84 H110 O4 Sm2                 |
| Mr                 | 1484.44                                | 1484.41                         |
| Dx,g cm-3          | 1.294                                  | 1.294                           |
| Z                  | 4                                      | 4                               |
| Mu (mm-1)          | 1.572                                  | 1.572                           |
| F000               | 3080.0                                 | 3080.0                          |
| F000'              | 3079.60                                |                                 |
| h,k,lmax           | 31,13,32                               | 30,13,32                        |
| Nref               | 6878                                   | 6033                            |
| Tmin,Tmax          | 0.893,0.969                            | 0.668,0.745                     |
| Tmin'              | 0.568                                  |                                 |
| Correction method= | # Reported T Limits: Tmin=0.668        |                                 |
|                    | Tmax=0.745 AbsCorr = MULTI-SCAN        |                                 |
| Data completeness= | 0.877                                  | Theta(max)= 25.208              |
| R(reflections)=    | 0.0534( 5099)                          | wR2(reflections)= 0.1307( 6033) |
| S =                | 1.189                                  | Npar= 472                       |

The following ALERTS were generated. Each ALERT has the format

**test-name\_ALERT\_alert-type\_alert-level.**

Click on the hyperlinks for more details of the test.

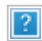**Alert level A**[PLAT029\\_ALERT\\_3\\_A](#) \_diffn\_measured\_fraction\_theta\_full value Low . 0.877 Why?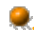**Alert level B**[PLAT911\\_ALERT\\_3\\_B](#) Missing FCF Refl Between Thmin & STh/L= 0.599 833 Report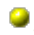**Alert level C**

[PLAT250\\_ALERT\\_2\\_C](#) Large U3/U1 Ratio for Average U(i,j) Tensor .... 2.3 Note  
[PLAT342\\_ALERT\\_3\\_C](#) Low Bond Precision on C-C Bonds ..... 0.0116 Ang.  
[PLAT906\\_ALERT\\_3\\_C](#) Large K Value in the Analysis of Variance ..... 6.532 Check  
[PLAT910\\_ALERT\\_3\\_C](#) Missing # of FCF Reflection(s) Below Theta(Min). 7 Note  
[PLAT972\\_ALERT\\_2\\_C](#) Check Calcd Resid. Dens. 0.99A From C10 -2.41 eA-3

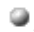**Alert level G**

[PLAT003\\_ALERT\\_2\\_G](#) Number of Uiso or Uij Restrained non-H Atoms ... 14 Report  
[PLAT083\\_ALERT\\_2\\_G](#) SHELXL Second Parameter in WGHT Unusually Large 84.23 Why ?  
[PLAT186\\_ALERT\\_4\\_G](#) The CIF-Embedded .res File Contains ISOR Records 1 Report  
[PLAT187\\_ALERT\\_4\\_G](#) The CIF-Embedded .res File Contains RIGU Records 2 Report  
[PLAT302\\_ALERT\\_4\\_G](#) Anion/Solvent/Minor-Residue Disorder (Resd 2 ) 100% Note  
[PLAT302\\_ALERT\\_4\\_G](#) Anion/Solvent/Minor-Residue Disorder (Resd 3 ) 100% Note  
[PLAT304\\_ALERT\\_4\\_G](#) Non-Integer Number of Atoms in ..... Resd 2 10.14 Check  
[PLAT304\\_ALERT\\_4\\_G](#) Non-Integer Number of Atoms in ..... Resd 3 4.86 Check  
[PLAT371\\_ALERT\\_2\\_G](#) Long C(sp2)-C(sp1) Bond C1 - C2 . 1.45 Ang.  
[PLAT371\\_ALERT\\_2\\_G](#) Long C(sp2)-C(sp1) Bond C3 - C4 . 1.43 Ang.  
[PLAT860\\_ALERT\\_3\\_G](#) Number of Least-Squares Restraints ..... 96 Note  
[PLAT909\\_ALERT\\_3\\_G](#) Percentage of I>2sig(I) Data at Theta(Max) Still 73% Note  
[PLAT933\\_ALERT\\_2\\_G](#) Number of OMIT Records in Embedded .res File ... 11 Note  
[PLAT978\\_ALERT\\_2\\_G](#) Number C-C Bonds with Positive Residual Density. 2 Info

- 1 **ALERT level A** = Most likely a serious problem - resolve or explain  
 1 **ALERT level B** = A potentially serious problem, consider carefully  
 5 **ALERT level C** = Check. Ensure it is not caused by an omission or oversight  
 14 **ALERT level G** = General information/check it is not something unexpected
- 0 ALERT type 1 CIF construction/syntax error, inconsistent or missing data  
 8 ALERT type 2 Indicator that the structure model may be wrong or deficient  
 7 ALERT type 3 Indicator that the structure quality may be low  
 6 ALERT type 4 Improvement, methodology, query or suggestion  
 0 ALERT type 5 Informative message, check

It is advisable to attempt to resolve as many as possible of the alerts in all categories. Often the minor alerts point to easily fixed oversights, errors and omissions in your CIF or refinement strategy, so attention to these fine details can be worthwhile. In order to resolve some of the more serious problems it may be necessary to carry out additional measurements or structure refinements. However, the purpose of your study may justify the reported deviations and the more serious of these should normally be commented upon in the discussion or experimental section of a paper or in the "special\_details" fields of the CIF. checkCIF was carefully designed to identify outliers and unusual parameters, but every test has its limitations and alerts that are not important in a particular case may appear. Conversely, the absence of alerts does not guarantee there are no aspects of the results needing attention. It is up to the individual to critically assess their own results and, if necessary, seek expert advice.

**Publication of your CIF in IUCr journals**

A basic structural check has been run on your CIF. These basic checks will be run on all CIFs submitted for publication in IUCr journals (*Acta Crystallographica*, *Journal of Applied Crystallography*, *Journal of Synchrotron Radiation*); however, if you intend to submit to *Acta Crystallographica Section C* or *E* or *IUCrData*, you should make sure that [full publication checks](#) are run on the final version of your CIF prior to submission.

## Publication of your CIF in other journals

Please refer to the *Notes for Authors* of the relevant journal for any special instructions relating to CIF submission.

PLATON version of 23/04/2018; check.def file version of 23/04/2018

## Datablock 1 - ellipsoid plot

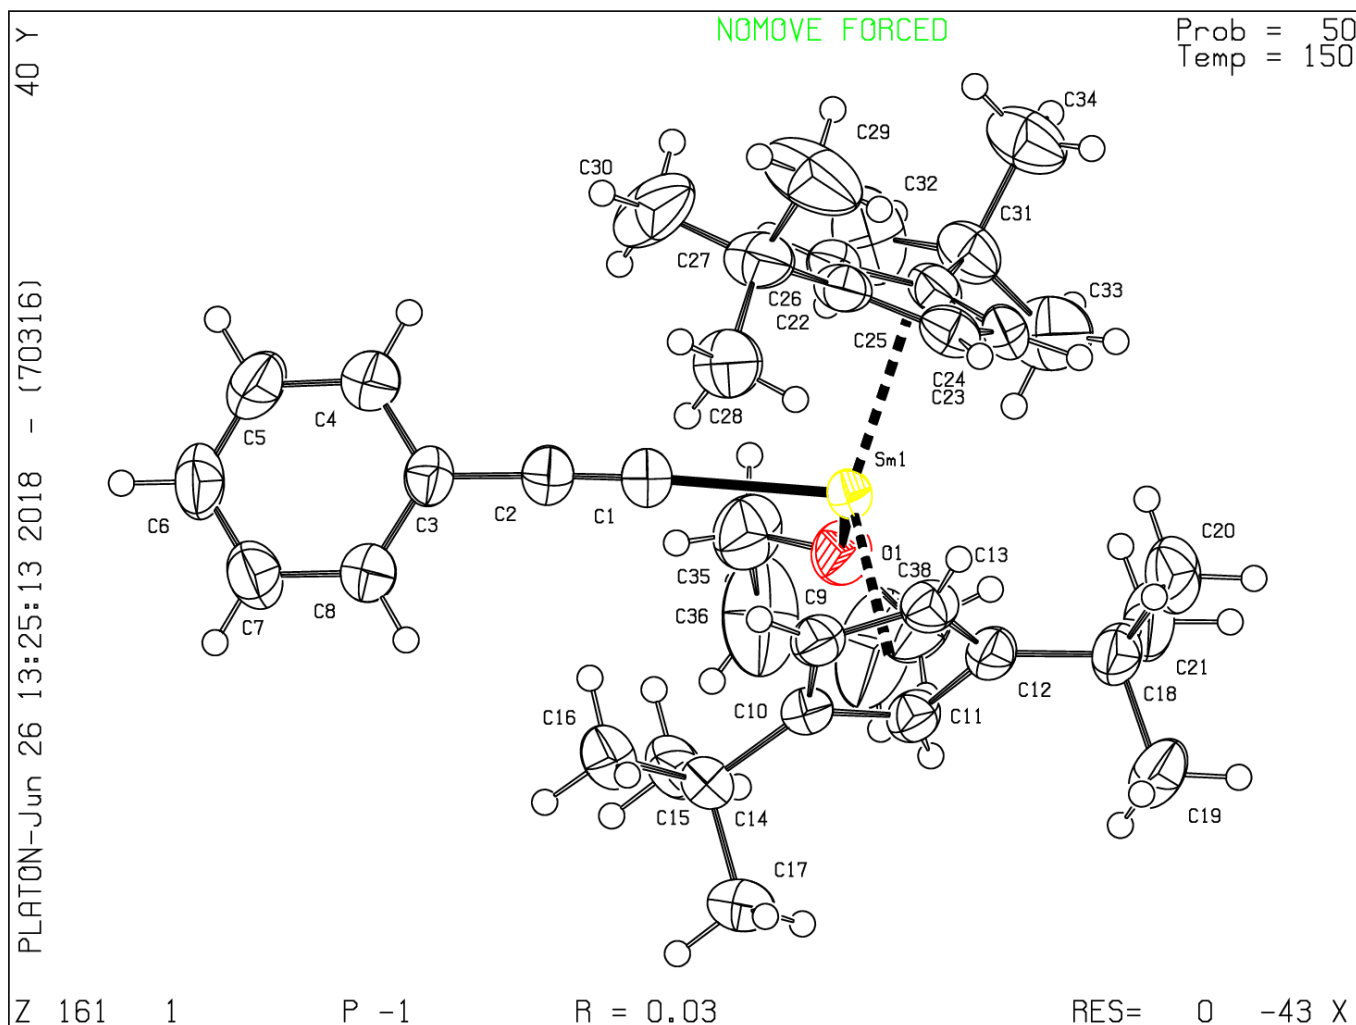

## Datablock 2 - ellipsoid plot

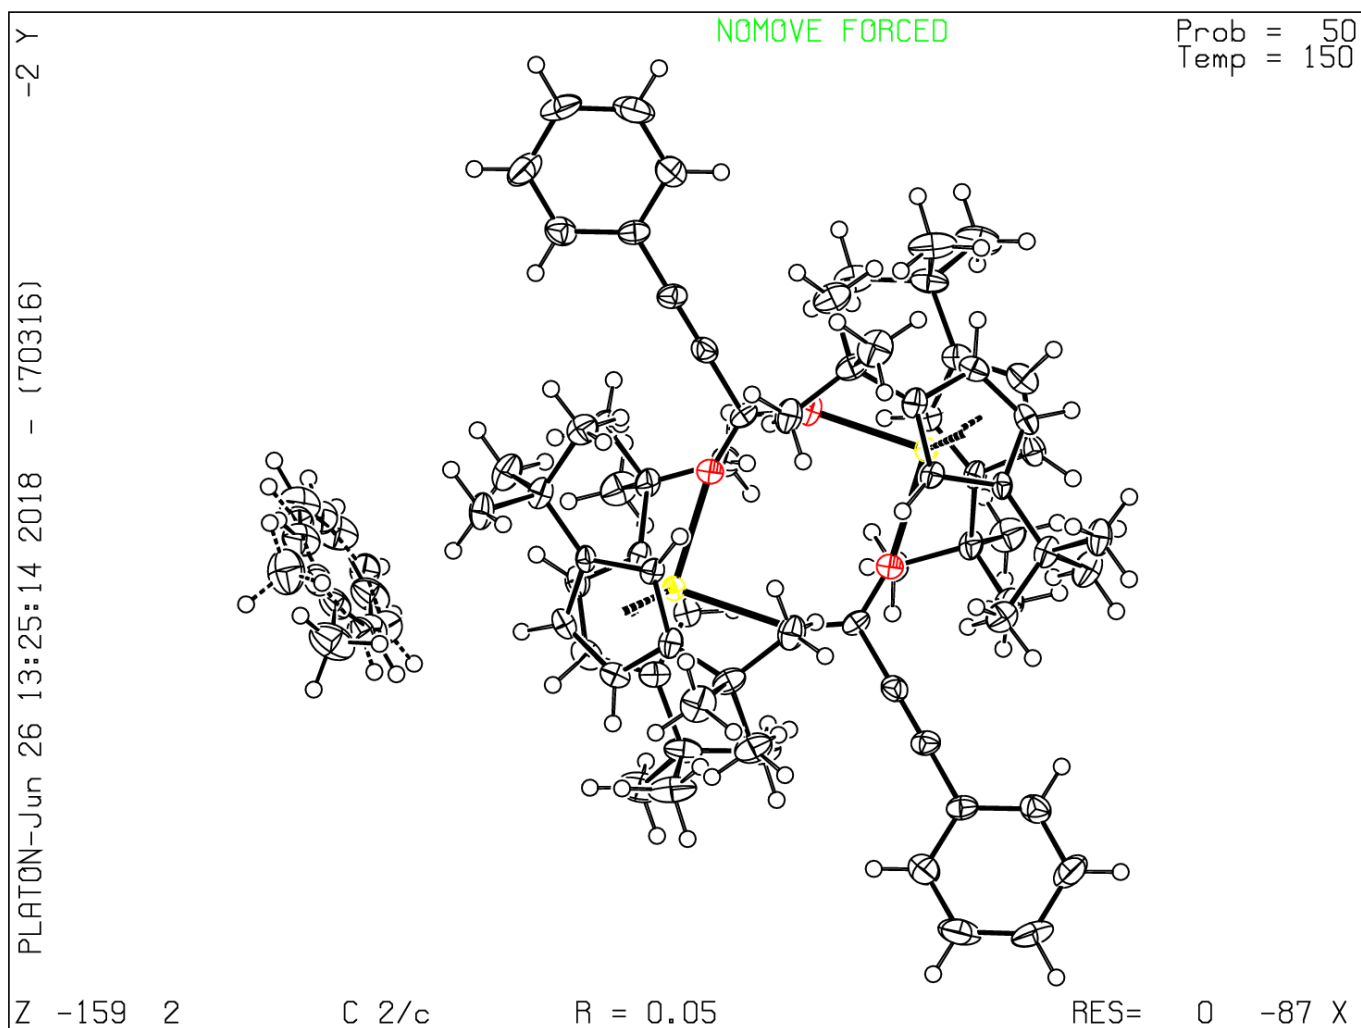

[Download CIF editor \(publCIF\) from the IUCr](#)  
[Download CIF editor \(enCIFer\) from the CCDC](#)  
[Test a new CIF entry](#)
